# Supplementary material for: Retrospective Observational Study of Daytime Add-On Administration of Zopiclone to Difficult-to-Treat Psychiatric Inpatients With Unpredictable Aggressive Behavior, With or Without EEG Dysrhythmia
Source: Front Psychiatry. 2021 Aug 17;12:693788. doi: 10.3389/fpsyt.2021.693788 (PMC8415882; doi:10.3389/fpsyt.2021.693788)
Supplement: Supplementary file 2 [file Table_1.XLSX]

## Sheet: Suppl.Table
Suppl.Table - Case reports
Case	Sex	Age	Diagnosis (Primary, secondary and Differential)	Age of 1st Episode of Illness	Main Reason for Zopiclone Initiation	Baseline Resting EEG Available (Yes/No)	Baseline EEG Main Findings	EEG Excess Theta/Delta	Hosptal Length of Stay (LOS), days	Psychiatric Medications Before Starting Zopiclone	Zopiclone Treatment Duration Until Discharge or Discontinuation, Days	Zopiclone Max Dose	Additional Psychiatric Medications at Time of Zopiclone Maximum Dose Was First Administered	Psychiatric Medications at Time of Discharge	Zopiclone Teatment Retrospective Review Duration (weeks)	Week-1 CGI-S	CGI-S LOCF	CGI-I LOCF	CGI-EI LOCF		SOAS-N Before Zopiclone (Average)	SOAS-S Before Zopiclone (Average)	SOAS-N LOCF	SOAS-S LOCF	SOAS-N After Zopiclone (Average)	SOAS-S After Zopiclone (Average)		Side Effects During Zopiclone Treatment	Discontinued Due to Side Effects (Yes/No)	Descriptive Summary	Degree of Improvement
1	M	31	Schizoaffective disorder, depressive subtype, with catatonia	30	Catatonia	No			102	Sertraline 100 mg daily Paliperidone 75 mg IM every 4 weeks Aripiprazole 5 mg QAM Lorazepam 3 mg QID	83	15 mg QID	Sertraline 100 mg daily Paliperidone Invega Sustenna 75 mg IM every 4 weeks Aripiprazole 5 mg QAM	Aripiprazole 400 mg IM every 4 weeks Bupropion xl 150 mg p.o. BID Sertraline 200 mg p.o. q.a.m. Zopiclone 3.75 mg p.o. bedtime	12	5	2	1	1		0	0	0	0	0	0		NR	No	31 y.o. male with a history of recurrent schizoaffective disorder, depressive subtype and severe catatonia (reduced food intake, marked hypomobility and rigidity). Catatonic symptoms not responding to antipsychotic drugs. Lorazepam 3 mg QID partially effective in reducing catatonic symptoms. Dose could not be increased any further due to the onset of ataxia and excessive sedation. Lorazepam was s…	Catatonic symptoms were much improved. CGI therapeutic effect: marked improvement and no side effects.
2	M	53	Schizophrenia Juvenile Huntington Disease	Dx with Schizophrenia at age 19 Dx with Huntington's at 17	Homicidal ideation, aggression	Yes	Generally, low-amplitude background in all head-regions 8-12 Hz predominate.	No	17	Clozaril 200 mg bedtime Clonazepam 0.25 mg b.i.d. Aripiprazole 400 mg I/M every 4 weeks	17	7.5 mg QID	Aripiprazole 400 mg I/M every 4 weeks Clozapine 300 mg p.o bedtime Escitalopram 5 mg p.o. daily	Aripiprazole 400 mg I/M every 4 weeks Clozapine 300 mg p.o bedtime Escitalopram 5 mg p.o. daily Zopiclone 7.5 mg p.o. QID	2	6	4	1	1		0	0.875	0	0	0	0		NR	No	53-year-old male admitted to our PICU due to homicidal threats. At the age 20 – stabbed and murdered a customer service employee. Initially NCR, then status revoked after Crown won appeal. For the last many years residing at a long-term care facility. After a new exacerbation of paranoid delusions with homicidal ideation, he was admitted to our PICU. Medication on admission: aripiprazole injectio…	+++Behavior (resolution of homicidal ideation), affect. +++UHDRS (involuntary movements sympatientom)
3	F	37	Schizoaffective Disorder, depressive subtype	Dx with Schizophrenia at age 18	Catatonia & Aggressive Behavior	Yes	Overall expression of slow theta activity (5Hz), no clear lateralizing features	Yes	41	Respiral Consta 37.5 IM q.2 weekly Zoloft 50 mg p.o. bedtime Zopiclone 7.5 mg bedtime	28	15 mg QID	Clozapine p.o. 250 mg at bedtime	Clozaril 250 mg p.o bedtime Zopiclone 15 mg p.o. QID	5	7	2	1	1		3	8.5	0	0	0.2	1.8		NR	No	37 y.o female with long history of schizoaffective disorder since age 18. Born after a difficult labor in a breach presentation. Born as a "blue baby" requiring oxygen. Learning difficulties in school. Intellectual disability suspected but never formally diagnosed. Abnormal EEG with excess expression of slow theta activity. Admitted to a general unit due to a new psychotic exacerbation, she was r…	+++Catatonia, ambulation, mood & agression Very much improved and no aggressive behavior at the time of dischrge.
4	M	20	Schizophrenia, ADHD, alcohol use disorder, reactive attachment disorder, ODD, generalized anxiety disorder	history of mental illness starting at 3 years of age.	Aggressive Behavior, outbursts of anger	Yes	Symmetrical, irregular, moderate amplitude, reactive 10 Hz occipital frequency. Lower amp 13-39 Hz frq seen frontally and centrally, and temporally moderate amp 8-12 Hz. 4-8 Hz waves infiltrate the background on both sides, a little more predominantly on the left. Impression: dysrhythmia characterized by an increase in slower frequencies.	Yes	204	Propranolol 20 mg BID Divalproex 1000 mg p.o. nightly Olanzapine 30 mg p.o. nightly Paliperidone 150 mg IM q. 4 weeks	8	5 mg TID	Propranolol 20 mg BID Divalproex 1000 mg p.o. nightly Olanzapine 30 mg p.o. nightly Paliperidone 150 mg IM q. 4 weeks	Divalproex 1000 mg p.o. nightly Lamotrigine 100 mg p.o at 20:00 Olanzapine 30 mg p.o. nightly Paliperidone 150 mg IM q. 4 weeks	5	4	4	4	13		0.125	0.8125	1	0	0.2	0.75		Feeling sleepy Drowsy	Yes	20 y.o male suffering from schizophrenia and remanded at AHE for a court order assessment of his mental health and fitness to stand trial. Remote history of reactive attachment disorder, anxiety and oppositional defiant disorder. For the first weeks of his hospitalization, patient. reported auditory & visual hallucinations, some aggressive behavior. After initiation of zopiclone patient. reported…	Patient requested to stop daytime zopiclone due to sedation. No clinical improvement during 5-day trial of zopiclone.
5	M	29	Organic brain damage, Intellectual disability Epilepsy Behavioral Disorder	history of mental retardation since birth	Aggressive Behavior	Yes	Symmetrical, irregular, low amplitude reactive 9 Hz background . Lower amplitude 13-29 Hz frq are present frontally, centrally, and temporally low amp 8-12 Hz waves predominate. 4-8 Hz waves of moderate amplitude appear in brief runs, intermittently particularly over the posterior temporal region on the left. The record is abnormal and demonstrates a dysrhythmia characterized by slowing in the ba…	Yes	43	Carbamazepine CR p.o. 500 mg BID Divalproex 1250 mg BID Levetiracetam 750 mg BID	37	15 mg TID	Carbamazepine CR p.o. 500 mg BID Divalproex 1250 mg BID Levetiracetam 750 mg BID Quetiapine 150 mg at bedtime	Carbamazepine CR 500 mg bid Citalopram 20 mg q.d. Divalproex 1250 mg bid Levetiracetam 750 mg bid Quetiapine 200 mg bid Zopiclone 15 mg q.h.s.	4	6	3	1	1		2	7.5	0	0	0.75	2.125		NR	No	29 y.o male, intellectually disabled, behaviorally disordered who is cared by his family. At the time of admission his father reported increasing aggression and agitation, unable to contain. After start of zopiclone, patient became much more settled, aggressive behavior improved, and patient doing well overall.	Very much improved overall and regarding aggressive behavior. Persistent EEG abnormalities while treated with zopiclone.
7	M	29	Autism spectrum disorder	Since birth	Aggressive & impulsive behavior	Yes	Symmetrical irregular moderate amplitude reactive 9 Hz occipital activity. Lower amplitude 13-29 Hz frq are present in the frontal regions and centrally and temporally moderate amp 8-12 Hz waves predominate.	No	73	Benztropine 1 mg p.o bid Aripiprazole 20 mg p.o. q.a.m. Fluvoxamine 75 mg. p.o q.a.m. & 50 mg p.o nightly Divalproex 750 mg bid Clopixol 10 mg p.o bid Lorazepam 2-4 mg Q6H p.r.n. Benztropine 1 mg p.o. bid	59	15 mg QID	Aripiprazole 20 mg p.o. q.a.m. Divalproex 750 mg bid Fluvoxamine 75 mg QAM + 50 mg at bedtime Zopiclone 15 mg QID GABA 500 mg q.i.d. Loxapine 10-25 mg p.o. p.r.n.	Aripiprazole 20 mg p.o. q.a.m. Divalproex 750 mg bid Fluvoxamine 150 mg. p.o bedtime Zopiclone 15 mg QID GABA 500 mg q.i.d. Loxapine 10-25 mg p.o. p.r.n.	8	6	3	1	1		3	3.75	0	0	0.625	1		NR	No	29 y.o male with autism spectrum disorder. He lives in supported group home. For the last few months patient became increasingly aggressive, punching and threatening staff. Soon after admission, he continued to be very angry and volatile. After treatment with zopiclone, patient became less irritable and more redirectable, without any excess sedation or other noticeable side effects.	Overall improved very much. Marked reduction of frequency and severity of aggressive incidents
8	M	23	FASD, intellectual disability, seizure disorder, polysubstance use disorder	History of epilepsy since early chilhood.Substance use disorder since age 17	Aggressive & violent behavior	Yes	Symmetrical irregular moderate amplitude reactive 8 Hz occipital activity. Lower amplitude 13-29 Hz frq are seen in the frontal regions and centrally and temporally a mixture of 4-8 and 8-12 Hz waves predominate. At times some higher amplitude 1-3 Hz waves disturb the background in a relatively generalized distribution. Impression: Dysrhythmia grade II generalized, maximum left temporal.	Yes	202	Carbamazepine CR p.o. 800 mg daily Risperidone p.o. 1 mg QAM and 1.5 mg at bedtime Zopiclone p.o. 7.5 mg at bedtime	68	15 mg QID	Carbamazepine CR p.o. 800 mg daily Risperidone p.o. 1 mg QAM and 2 mg at bedtime Divalproex p.o. 500 mg bid Lithium carbonate p.o. 600 mg at bedtime	Clozapine 200 mg bedtime Divalproex 500 mg p.o. bid Levetiracetam 1000 mg p.o. bid Zopiclone 5 mg p.o. bedtime Quetiapine 50-100 mg p.o p.r.n.	10	7	7	4	14		1.25	5.875	0	0	1.3	3.6		Drowsy Tired	No	23 y.o male with history of FASD, intellectual disability, seizure disorder and polysubstance usedisorder. Initially admitted to a general unit, he was transferred to our PICU after he assaulted a peace officer. During his hospitalization at AHE had numerous incidents of aggression. After several medication changes, zopiclone was tried. It was believed to reduce the frequency and severity of aggr…	Zopiclone was poorly tolerated and minimally effective. Patint responded much better to a subsequent trial of clozapine
9	F	18	Autism spectrum disorder, severe intelectual disability	2-year-old	Aggressive Behavior & Self-Harm	Yes	Th record revealed symmetrical, irregular, moderate amplitude, reactive 10 Hz occipital activity. Lower amplitude, 13 to 29 Hz frequencies are seen frontally, and these faster frequencies are superimposed upon more posterior head regions as well. Centrally and temporally moderate amplitude 8 to 12 Hz waves predominate. Hyperventilation and photic stimulation were not carried out. An ECG recorded …	No	1364	Quetiapine p.o. 100 mg XR bid	90	15 mg QID	Olanzapine p.o 10 mg BID Hydroxyzine p.o. 10 mg at bedtime Escitalopram p.o. 10 mg QAM GABA 500 mg QID	Olanzapine 20 mg nightly. Olanzapine 10 mg q.a.m. Lorazepam 2 mg sublingual b.i.d. Cipralex 15 mg q.a.m. Doxepin 10 mg at bedtime. Amitripatientyline 25 mg at bedtime. Clopixol 10 mg b.i.d. Quetiapine 100 mg up to q.i.d. p.r.n. Lorazepam 1 mg sublingual up to q.i.d. p.r.n.	12	5	4	2	5		1	5	0	0	0.0833333	0.25		Drowsy apperance (reported by mother)	Yes	18 y.o female with severe intellectual disability and autism spectrum disorder living with her parents & brother prior to hospitalization. Patient is non-verbal. Recent increase in agitation & reported 'change in demeanor', pacing around a lot, sleeping less, stripping clothes off, banging head, biting, emotionally labile. During her stay in our PICU, initially she required constant observation b…	Marked improvement of aggressive Behavior. After several months of treatment, end of dose phenomena were observed.
10	F	62	Schizoaffective disorder bipolar type, unspecified neurocognitive disorder	Since grade 7th	Aggressive behavior, labile mood	Yes	Symmetrical irregular moderate amplitude reactive 7 Hz occipital activity. Lower amplitude 13-29 Hz frq are seen in the frontal regions and centrally and temporally 4-8 Hz waves predominate. The record is interrupatiented frequently by higher amplitude, 1-3 Hz waves which occur in longer intervals up to 10 sec.	Yes	371	Lurasidone 160 mg bedtime Lithium Carbonate 600 mg bedtime Zopiclone 7.5 mg nightly Divalproex 1000 mg BID Clobazam 10 mg nightly	173	15 mg QID	Lithium Carbonate 900 mg bedtime Divalproex 1000 mg BID Quetiapine 700 mg daily in 3 divided doses	Quetiapine 400 mg at bedtime Zopiclone 15 mg QID Divalproex 500 mg bid Lithium carbonate 450 mg at bedtime Mirtazapine 30 mg bedtime	12	7	5	2	5		0.75	2.125	0	0	0.0833333	0.833333		NR	No	62 y.o. female living in a group home with longstanding history of schizoaffective disorder. She was admitted to hospital after exacerbation of bizarre and disorganized behavior and a major outburst of anger, when she threw her walker to staff and then injured herself after punching a fire hydrant box numerous times. New medications including Zopiclone helped to stabilize her affect and markedly …	Marked improvement of aggressive behavior and of mood rapid cycling.
11	M	31	Schizoaffective disorder, bipolar type, FASD, cannabis use disorder	Dx with Schizophrenia at age of 18	Aggressive behavior	Yes	Symmetrical, poorly reactive, low amplitude fast frequencies in all head regions. These were 13-29 Hz range and were superimposed upon all head regions, likely representing medication influence. Centrally and temporally, low amp 8-12 Hz waves predominant.	No	71	Divalproex 500 mg p.o. every morning. Divalproex 750 mg p.o. every evening. Quetiapine XR 400 mg p.o. b.i.d.	27	15 mg QID	Wellbutrin XL 150 mg p.o. q.a.m. Quetiapine XR 600 mg p.o nightly Quetiapine XR 300 mg p.o q.a.m. Divalproex 750 mg p.o. nightly Divalproex 500 mg p.o. q.a.m.	Zopiclone 15 mg p.o. QID Wellbutrin XL 150 mg p.o. q.a.m. Quetiapine XR 600 mg p.o nightly Quetiapine XR 300 mg p.o q.a.m. Divalproex 750 mg p.o. nightly Divalproex 500 mg p.o. q.a.m.	4	6	3	1	1		0.5	4.08333	0	0	0	0		NR	No	31 y.o male who lived with his adopatiented brother. Patient had been noncompliant with medication and using cannabis. Presented with paranoid delusions, bizarre & aggressive behavior. During his hospitalization he presented as a very challenging patient, argumentative, irritable, angry, making derogatory comments. His challenging behavior and anger outbursts much improved on Zopiclone, although …	Marked improvement of aggressive behaviour
12	F	30	Bipolar I disorder, depressive episode with severe catatonic features	Long history of Bipolar Disorder. Exact age of onset unclear. Probably around age 18. Seizures disorder since the age of 14.	Catatonic Syndrome	Yes	Nonspecific generalized low amplitude background and an increase in faster frequencies, which likely represented medication influence.	No	56	Aripiprazole Inj 400 mg IM every 4 weeks Divalproex 500 mg bid Lithium carbonate 600 mg at bedtime Lorazepam 3 mg QID	44	15 mg QID	Aripiprazole Inj 400 mg IM montly Divalproex 500 mg bid Lithium carbonate 600 mg at bedtime Mirtazapine 15 mg at bedtime	Aripiprazole Inj 400 mg IM montly Divalproex 500 mg bid Lithium carbonate 600 mg at bedtime Mirtazapine 30 mg at bedtime Zopiclone 15 mg QID	7	6	1	1	1		0	0	0	0	0	0		NR	No	30 y.o female living with her boyfriend. She was hospitalized for exacerbation of psychosis, severe thought process disorganization and catatonic symptoms. After few days of her admissions patient. became severely catatonic with mutism, & oppositional behavior. Response to diffrent medication including lorazepam 3 mg QID was poor, and more potent antipsychotic were not tried due to her history of…	Marked improvement of catatonic and psychotic symptoms. Treatment was well tolerated.
13	F	50	Schizophrenia, paranoid type	Long history of Schizophrenia. Precise age of onset unknown. Probably early adulthood.	Agitation, abnormal EEG findings	Yes	Abnormal EEG with excessive slow waves in temporal and frontal regions.	Yes	162	Aripiprazole IM 400 mg Q4W Venlafaxine XR 150 mg q.a.m	112	11.25 mg qid	Clozapine 125 mg bedtime Aripiprazole Maintena 400 mg IM evrery 4 weeks	Clozapine 300 mg bedtime Aripiprazole Maintena 300 mg IM evrery 4 weeks Zopiclone 11.25 mg p.o. qid	8	6	3	1	1		0	0	0	0	0	0		NR	No	50 y.o single female with a long history of Schizophrenia. Presented to hospital with worsening psychotic symptoms and agitation. In hospital she was staring all day the same wall in her room and would be selectively mute or answer some question with yes or no answers. While on Zopiclone she began communicationg with staff. She reported that after commencing zopiclone "it is helping me to think" …	Marked improvent of her ability to communicate. Resolution of perplexity. Residual paranoid delusions improved only after commencing clozapine.
15	F	42	Major frontotemporal neurocognitive disorder. Premorbid cluster B traits	First encounter with Psychiatry at age 42, but presented with depressive symptoms in ER between the ages of 39 & 42	Aggressive Behavior Agitation	Yes	EEG Aug 30, 2013 - showed a grade 2 generalized dysrhythmia with a maximum seen in the frontotemporal area. The record is interrupatiented at times by fronto-temporal slowing, in the 4-8 Hz range and occasionally 1-3 Hz frequencies. EEG Oct 30, 2013 - showed a mild dysrhythmia characterized by slower frequencies, infiltration in the temporal and occipital head regions as well ass some mild underl…	Yes	348	Sertraline 150 mg p.o at bedtime Zopiclone 7.5 mg at bedtime Lorazepam 1 mg QID	302	15 mg QID	Doxepine 20 mg at bedtime	Mirtazapine 30 mg in a.m and 30 mg at bedtime Quetiapine 50 mg at bedtime Zopiclone 15 mg qid	12	7	5	1	5		0	0	0	0	0	0		NR	No	42 y.o. female with a history of rapidly progressive neurocognitive disorder. CT and MRI showing cerebral atrophy. PET scan: markedly abnormal hypometabolism is demonstrated involving the frontal lobes, parietal lobes, and temporal lobes as well as the cerebellum in a symmetric fashion with relative sparing of the occipital lobes, sensorimotor strips and basal ganglia. Voltage-Gated Potassium Cha…	Marked improvement of aggressive behavior, concentration, alertness, cooperation.
16	M	62	Organic brain syndrome (TBI at the age of 6), alcohol use disorder	6-year-old	Aggressive behavior and agitation	Yes	Symmetrical, irregular, moderate amplitude, reactive 8 Hz occipital activity. Lower amp 13-29 Hz frq seen frontally and centrally, and temporally moderate amp 8-12 Hz waves predominate. The record is occasionally disrupatiented by generally occurring high amplitude sharp slow complexes more prominent on the right. Impression: Dysrhythmia grade II generalized maximum right, characterized by interm…	Yes	157	Valproic Acid 500 mg bid Zopiclone 7.5 mg at bedtime Quetiapine 50 mg bid	71	7.5 mg qid	Divalproex p.o. 500 mg BID Quetiapine p.o. 50 mg BID + 100 mg at bedtime	Divalproex 750 mg p.o. bid Quetiapine 50 mg q. a.m and 100 mg at 14:00 & 20:00 Zopiclone 7.5 mg p.o. qid	12	6	4	2	5		0.5	1.5	0	0	0	0		NR	No	62 y.o single male with history of organic brain syndrome and multiple medical comorbidities. Admitted to the PICU due to increasing and unmanageable agitation and aggression at his group home. While in hospital he was tried on a combination of antipsychotics and mood stabilizer, which helped, but were unable to completely control his irritable affect. Eventually he was tried on Zopiclone during …	Marked improvement of agression and improvement of his concentration Complete rremission of aggressive behaviour.
17	M	59	Treatment resistant depression Bipolar type, with somatic delusions	First encounter with Mental Health at age 54	EEG showing mild background slowing in all head regions Irritable affect	Yes	Symmetrical irregular moderate amplitude reactive 7 Hz occipital activity. Low amp 13-29 Hz frq are present frontally and centrally and temporally moderate amplitude 4-8 and 8-12 Hz waves predominant.	Yes	324	Gabapentine 300 mg p.o. tid Zopiclone 7.5 mg at bedtime Lurasidone 120 mg p.o q.p.m. Venlafaxine XR 75 mg p.o daily Clozapine 25 mg p.o. nightly	22	7.5 mg qid	Clozapine p.o. 100 mg BID Gabapentin p.o. 600 mg at bedtime Phenelzine p.o. 45 mg BID	Aripiprazole 5 mg p.o. q.a.m Clomipramine 175 mg p.o. q.a.m. Fluvoxamine 125 mg p.o. q.a.m.	7	6	6	4	13		0	0	0	0	0	0		NR	No	59 y.o male living alone in a condo. Patient presented to ER with chronic abdominal pain repeating the phrase 'please pray for the pain in my guts'. Patient suffering from somatic delusions and continuously asking people to pray for him. Patient medication was adjusted multiple times, completed 9 sessions of ECT, which proved unsuccessful. Later on he was restarted on maintenance ECT, once per we…	No improvement while receiving zopiclone daytime.
18	M	19	Antisocial personality disorder, intellectual disability, moderate severity, fragile X syndrome	history of mental illness from an early age.	Aggressive behavior Impulsiveness	Yes	Symmetrical irregular moderate amplitude reactive 9 Hz occipital activity. Lower amplitude 13-29 Hz frq are present in the frontal regions and centrally and temporally moderate amp 8-12 Hz waves predominate. At times some 4-8 Hz waves are noted over the right sided leads, and occasionally even 1-3 Hz waves are seen in this area.	Yes	66	Aripiprazole 400 mg IM Q 4 weeks Zopiclone 7.5 mg at bedtime Olanzapine 10 mg at supper	54	15 mg QID	Clozapine p.o. 150 mg BID Venlafaxine XR 75 mg QAM	Clozapine 50 mg p.o. QAM Clozapine 150 mg p.o. supper Zopiclone 7.5 mg p.o. QID	8	7	3	1	1		2	6.75	0	0	0.625	2.6875		NR	No	19 y.o male who lives in a group home. Patient interacted with the justice system numerous times due to his deceitful, aggressive and impulsive behavior. Patient has a history of moderate intellectual disability, fragile X syndrome, and antisocial personality disorder. Other diagnoses have also been proposed such as schizoaffective disorder, ODD, ADHD, PTSD, and FASD. He had a history of poor tol…	Marked improvement of aggressive and impulsive behaviour
19	M	46	Schizoaffective disorder, bipolar type, cardiomyopathy secondary to clozapine	Long history of Schizophrenia, the first hospitalization at age 41.	Threatening aggressive behavior and hypersexual behavior	No			223	Divalproex 500 mg hs Lithium carbonate 900 mg hs Loxapine 20 mg hs Quatiapine 300 mg hs Zopiclone 15 mg at bedtime	33	7.5 mg bid	Lithium carbonate 900 mg hs Loxapine 20 mg hs Quatiapine 300 mg hs Divalproex p.o. 1000 mg at bedtime	Gabapentine 300 mg p.o. tid Lamotrigine 125 mg p.o. bid Zuclopenthixol Decanoate 200 mg IM q2 weekly	4	6	6	4	13		0.166667	0.833333	0	0	0.25	1.625		Feeling tired	No	46 y.o single male with long history of schizoaffective disorder, treatment resistant. Patient had multiple admissions. Clozapine had been helpful in thepast in controlling his psychosis. However clozapine had been stopped due to the onset of myocarditis. Poor compliance with medication. Zopiclone proved ineffective in controlling his psychotic symptoms. Furthermore patient was unwilling to take …	Not improved, however his compliance to treatment was poor. Patient refused to increase dose of zopiclone and decided to stop this medication. No objective evidence of side effects.
20	M	20	Schizophrenia versus organic psychotic disorder, uUnspecified neurocognitive disorder	Traumatic brain injury at age 17, which was followed by recurrent headaches and then onset of sever psychotic illness.	Aggressive behavior and agitation	Yes	Normal EEG with physiological expression of Alpha and Beta rhythms.	No	241	Clozapine 150 mg at bedtime Divalproex 500 mg at bedtime	3	3.75 mg QID	Clozapine p.o. 150 mg at bedtime	Lithium 900 mg p.o daily Loxapine 25 mg p.o. tid and 75 mg at bedtime Mirtazapine 15 mg p.o. bid	1	7	7	5	13		0.333333	0.666667	0	0	0	0		NR	No	20 y.o male living with his family. Documented diagnosis of schizophrenia spectrum disorder against a background of pervasive developmental disorder. History of prenatal exposure to Dilantin, traumatic brain injury at age 17 that was followed by a progressive cognitive decline. Significant history of gasoline & glue sniffing, cocaine & amphetamine use. Patient was trialed on multiple psychiatric …	No improvement. Zopiclone trial was short as patient appeared to become more agitated
22	M	33	Schizoaffective disorder, bipolar type	History of severe psychotic illnes since age 25	Aggressive Behavior, Irritability	Yes	Symmetrical, irregular, moderate amplitude reactive 8Hz occipital activity. Lower amplitude 13-29 Hz frequency are present in the frontal regions and centrally and temporally moderate amplitude 8-12 Hz waves predominate. Hyperventilation and photic stimulation did not yield additional information.	No	193	Divalproex 500 mg p.o. QAM and 1000 mg at supper. Lorazepam 1.5 mg tid Benztropine 1 mg bid Zuchopenthixol 300 mg IM q2 weeks Zuclopenthixol p.o.10 mg TID Carbamazepine CR 600 mg BID	33	15 mg QID	Divalproex 500 mg p.o. QAM and 1000 mg at supper. Lorazepam 1.5 mg tid Benztropine 2 mg bid Zuchopenthixol 250 mg IM q2 weeks Carbamazepine CR 200 mg BID	Zuchopenthixol 200 mg IM q2 weeks Clozapine 225 mg p.o at bedtime	6	7	3	1	1		0.25	2.25	0	0	0	0		Initially no side effects. Subjective sedation and tiredness after commencing clozapine with zopiclone	No	33 y.o male who was leaving with his parents and brother prior to admission. He had a history of severe psychotic illness dating back to 2007. He was on paliperidone long-acting depot until he stopped due to side effects, after which patient started to deteriorate. In the hospital patient displayed severe violent behavior, assaulting several staff and copatients. He was tried on different medicat…	Marked improvement of aggression, however zopiclone did not promote any improvement of positive psychotic symptoms. Clozapine in combination with zopiclone caused excessive sedation/tiredness. Zopiclone and clozapine given alone (not in combination) were well tolerated.
23	M	34	Schizophrenia, intellectual disability, polysubstance use disorder (mostly methamphetamine), FASD	Unknown. Behavioral difficulties reported since adolescence.	Agression and agitation	Yes	Normal EEG. Symmetrical, irregular generally low amplitude reactive 10 Hz occipital activity. Low amplitude 13-29 Hz frequency are present frontally and these faster freq. are superimposed upon more posterior head regions as well. Centrally and temporally low amplitude 8-12 Hz waves predominate. Hyperventilation and photic stimulation did not yield additional information.	No	1435	Paliperidone 150 mg IM every 4 weeks Olanzapine 20 mg p.o. qhs Divalproex 1500 mg p.o qhs Quetiapine 100 mg qhs	41	7.5 mg TID	Divalproex p.o. 1500 mg at bedtime Mirtazapine p.o. 15 mg at bedtime Olanzapine p.o. 5 mg at bedtime	Clonidine 0.4 mg bid Clozapine 550 mg nightly Flupenthixol Decanoate 30 mg IM q.2 weeks Lithium 600 mg nightly Zopiclone 7.5 mg nightly Quetiapine 300 mg nightly	3	5	5	5	9		0	0	0	0	0	0		NR	No	34 y.o male with a history of polysubstance use, substance-induced psychosis, and schizophrenia with multiple previous admissions. His admissions were primarily for substance-induced psychosis & medication non-compliance. He was started on Zopiclone for aggressive behaviour and agitation. Zopiclone was stopped after he eloped and he was brought back to hospital intoxicated with methamphetamine.	Assessment of improvement complicated by patient's substance abuse and non-compliance while in hospital.
24	M	24	Autism spectrum disorder, severe intellectual disability, language disorder	Since 2 years old	Aggressive Behavior towards self & others	No	Symmetrical, irregular moderate amplitude 1 to 3 and 4 to 8 Hz background activity of sleep. Some sleep spindles were noted and K complexes consistent with stage II sleep. Essentially a normal sleep recording.		31	Procyclidine 5 mg qam Carbamazepine 200 mg bid Olanzapine 12.5 mg qam & 20 mg hs Zuchopenthixol 25 mg bid Gabapentine 400 mg tid	21	15 mg QID	Fluoxetine 40 mg QAM Loxapine 25 mg BID Gabapentin 600 mg t.i.d.	Loxapine 25 mg b.i.d. Zopiclone 15 mg q.i.d. Gabapentin 600 mg p.o. t.i.d. Loxapine 10-25 mg q. 6h p.r.n.	4	7	5	2	1		0	0	0	0	0	0		NR	No	24 y.o male with a history of autism spectrum disorder and severe intellectual disability. Patient is non-verbal and requires total care. After initiation of zopiclone, patient improved significantly, he became calm with no aggressive outbursts. His gait was more coordinated and he was able to walk by himself. After further improvement, patient was discharged to a supported living facility.	Marked improvement of aggressive Behavior and improved gait coordination
25	M	53	Progressive vascular neurocognitive disorder, secondary to multiple lacunar strokes in the basal ganglia area and right frontal and left parietal subcortical area (age 49)	49	Aggressive behavior and sexual disinhibition	Yes	Symmetrical irregular low amplitude reactive 11 Hz occipital activity and Low to moderate amplitude 8-12 Hz. waves frontally, centrally and temporally.	No	104	Fluvoxamine 100 mg H.S. Risperidone 1 mg B.I.D. Tolterodine LA 4 mg H.S. Zopiclone 7.5 mg morning and noon. PRN medications: Benztropine, Chlorpromazine, Olanzapine.	259	15 mg QID	Fluvxamine 150 mg at bedtime	Fluvoxamine 150 mg QHS Zopiclone 15 mg twice a day	9	6	4	2	1		0.666667	1.33333	0	0	0	0		NR	No	53 y.o. male, admitted to the PICU after being evicted from his group home, following repeted incidents of aggression and hypersexual behavior. Clinical presentation: resistive and hostile, hypersexual behavior, hyperkinesias and dyskinesias, unsteady gait, Broca’s aphasia. No improvement with multiple drugs, including benzodiazepines and high dose antipsychotics. Dramatic Improvement with zopicl…	Much improved: hypersexual behavior, cognition, cooperation, compulsive behavior, gait, ambulation, right hand fine movements. Resolution of aggressive behavior.
26	M	29	Schizophrenia, polysubstance use disorder	Not known	Abnormal EEG	Yes	Symmetrical, irregular, moderate amplitude, reactive 9 Hz occipital activity. Lower amp 13-29 Hz frq seen frontally and centrally, and temporally moderate amp 8-12 Hz waves predominate. Occasionally slowing is seen independently in both the left and the right frontal and temporal regions. Impression: Dysrhythmia characterized by intermittent slowing over the fronto-temporal regions on both sides.	Yes	58	Olanzapine 30 mg q.h.s Risperidone 3 mg at bedtime Propranolol 20 mg at bedtime Divalproex 1000 mg at bedtime	15	5 mg TID	Propranolol 20 mg at bedtime Divalproex 1000 mg p.o. nightly Olanzapine 30 mg p.o. nightly Paliperidone LAI 150 mg IM q. 4 weeks	Paliperidone 150 mg IM q.4W. Olanzapine Zydis 25 mg p.o. nightly. Benztropine 0.5 mg p.o. nightly. Divalproex 750 mg p.o. nightly. Zopiclone 7.5 mg p.o. nightly	2	4	3	2	6		0	0	0	0	0	0		Sedation	No	29 y.o male, unemployed, with no fixed address that presented himself to ER with delusional beliefs about various things. Patient has a history of schizophrenia and polysubstance abuse. He was tried on zopiclone due to his abnormal EEG, which deemed partially beneficial.	Mild improvement of auditory and visual allucinations. Patient complained that zopiclone made him tired and fatigued
27	F	34	Early Onset Frontotemporal Dementia Bipolar Disorder Substance Induced Mood Disorder	At 31 years of age	Sexual Disinhibition Stereotypic movements Agitation	Yes	There is an overall excess expression of slow theta waveforms (6-7 Hz polymorphic) in a broad field of distribution. This would imply a mild encephalopathy state. In addition there is a pattern of excess slow delta activity involving the left temporal region.	Yes	273	Benztropine 1 mg p.o bid Clonazepam 1 mg bid Zopiclone 5 mg q.h.s Risperidone 0.75 mg q.a.m. & 1 mg q.h.s.	28	7.5 mg QID	Risperidone 1 mg BID Mirtazapine 15 mg at bedtime	Risperidone 1 mg p.o. QAM. Zopiclone 5 mg p.o. QAM, 7.5 mg p.o. nightly. Mirtazapine 30 mg p.o. nightly. Loxapine 10 to 25 mg p.o. IM q.6 h. p.r.n. Cogentin 1 to 2 mg p.o. b.i.d. p.r.n.	9	6	6	3	9		0	0	0	0	0	0		Sedation, Insomnia at dose of 7.5mg QID. Resolution of side effects after reducing the dose.	No	34 y.o female, Dx with early onset major frontotemporal neurocognitive disorder. PET study revealed severe hypometabolism of the frontal lobes. Patient had multiple medical assessments both on the part of Internal Medicine and Neurology, but eventually was transferred to AHE. During her hospitalization the Patient was disinhibited, often sexually inappropriate towards other females. Periods of hy…	Mild improvement of sexual disinhibition. Dose markedly reduced due to daytime sedation and nightime insomnia
28	F	55	Schizoaffective Disorder, depressive type. OCD	Long history of mental illness, age of onset unclear	Failure to respond to multiple drugs	Yes	Normal EEG	No	123	Zopiclone 7.5 mg at bedtime Olanzapine 10 mg p.o. at bedtime Quetiapine 100 mg p.o. at bedtime	13	3.75 mg BID	Clozapine 225 mg at bedtime Doxepine 10 mg at bedtime Mirtazapine 15 mg at bedtime Venlafaxine 300 mg QAM	Clozapine 225 mg p.o. q.h.s. Doxepin 10 mg p.o. daily Mirtazapine 15 mg p.o. at bedtime Effexor XR 300 mg p.o. q.a.m Zopiclone 5 mg p.o. at bedtime Ativan 1mg p.o q.12 h.	2	3	3	4	13		0	0	0	0	0	0		NR	No	55 y.o female, Dx of schizoaffective disorder. Patient has a long history of schizoaffective disorder. She was readmitted to hospital after she had a relapse of severe auditory hallucinations, inhibited depression with hipochondriacal beliefs, after she had stopped her medications, fearing getting poisoned. While hospitalized was tried on multiple medications, with little improvement. Eventually …	No improvement. Zopiclone trial was short and at a low dose.
29	M	57	Bipolar Affective Disorder Generalized Anxiety Disorder Parkinson Disease	Had many depressive episodes through his life, most sever at age 50	Tremor, Anxiety	Yes	Symmetrical, irregular, moderate amplitude, reactive 8 Hz occipital activity. Lower amp 13-29 Hz frq seen frontally and centrally, and temporally moderate amp 8-12 Hz waves predominate. 4 to 8 Hz waves infiltrate the background centrally and temporally fairly regularly.	Yes	120	Lithium carbonate 1050 mg at bedtime. Lamotrigine 100 mg twice daily. Levodopa 100 mg, carbidopa 25 mg 1 tablet TID and 2 tabs at bedtime Lorazepam 0.5 mg tid Pramipexole tablet 1 mg tid Quetiapine 200 mg at 5:00 p.m. Quetiapine 50 mg 3 times daily. Zopiclone 15 mg h.s.	23	7.5 mg TID	Lithium carbonate 1050 mg at bedtime. Lamotrigine 100 mg twice daily. Levodopa 100 mg, carbidopa 25 mg 1 tablet TID and 2 tabs at bedtime Lorazepam 0.5 mg at 17:00 Pramipexole tablet 1.5 mg tid Quetiapine 50 mg TID and 200 mg at bedtime Quetiapine 50 mg 3 times daily.	Lithium carbonate 1050 mg at bedtime. Lamotrigine 100 mg twice daily. Levodopa 100 mg, carbidopa 25 mg 1 tablet 3 times a day. Levodopa/carbidopa chronic release 200 mg - 50 mg 1 tablet daily at 2100 hours. Lorazepam tablet sublingual 0.5 mg at supper. Pramipexole tablet 1 mg 3 times a day. Quetiapine 200 mg at 5:00 p.m. Quetiapine 50 mg 3 times daily. Trazodone 200 mg at bedtime. Zopiclone 7.5 m…	6	4	3	2	5		0	0	0	0	0	0		Insomnia	No	57 y.o male with history of Bipolar Affective Disorder, GAD and parkinson's disease. Patient was tried on Zopiclone. The beneficial effects on anxiety and parkinson's disease symptoms could be attributed to either zopiclone, pramipexol, or both.	Mild improvement of anxiety, pakinson's tremor and gait.
31	F	48	Major Depressive Disorder GAD Somatization Disorder Pervasive Developmental Disorder	Not known	Anxiety	No			162	Duloxetine 60 mg q.a.m. p.o. Lurasidone 60 mg bid Zopiclone 7.5 mg bedtime Clonazepam 0.5 mg bid	11	3.75 mg TID	Temazepam 30 mg at bedtime Lurasidone 40 mg BID Duloxetine 30 mg QAM	Clonazepam 1 mg bid Risperidone M 3 mg p.o. bid Temazepam 45 mg p.o. nightly Duloxetine 60 mg q.a.m. p.o.	2	4	4	5	11		0	0	0	0	0	0		Sedation	Yes	48 y.o female with history of borderline intellectual functioning that recently she has been very preoccupied about several somatic concerns. Dx with MDD, GAD, Somatization Disorder, and PDD. Patient improved and settled quickly after admission, more significant improvement was noticed when her 4 adult children were placed in a suitable accommodation. Patient was tried on Zopiclone for her Anxiet…	No improvement of anxiety. Zopiclone titration was stopped due to sedation
32	M	22	Unspecified Disruptive and Impulsive Control Disorder Intellectual Disability	Age 18	Aggression Sexual Disinhibition	No			71	Benztropine 2 mg bedtime Clonazepam 1 mg tid Loxapine 20 mg qid Quetiapine XR 600 mg supper & 300 mg q.a.m. Trazodon 150 mg h.s	48	15 mg QID	Clonazepam 1 mg QID Loxapine 20 mg QID Quetiapine XR 300 mg QAM + 600 mg at supper Trazodone 150 mg at bedtime Benztropone 2 mg at bedtime	Zopiclone 15 mg p.o. QID Clozapine 200 mg p.o. BID Loxapine 25 mg p.o q8h PRN	7	7	4	2	1		1.25	5.25	0	0	0.571429	1.85714		NR	No	22 y.o transferred from another Province to a local group home. At age of 18 was Dx wit Alcohol, inhalant, cannabis use disorders and possible neurocognitive impairment due to prolonged use of inhalants. In Edmonton patient begun displaying extremely aggressive behavior, became violent towards staff in group home and was arrested. While in remand patient tried to hang himself and was brought to E…	Marked improvement of his behavior combining zopiclone and clozapine
35	M	26	Intellectual disability Behavioral Disorder not otherwise specified Impulse Control Disorder Seizure Disorder	Birth asphyxia and severe head injury at age 6	Aggression	No			357	Citalopram 40 mg q.a.m Clobazam 10 mg tid Clozapine 300 mg h.s Divalproex 750 mg bid Lamortigine 25 mg q.a.m Zuchopenthyxol 150 mg weekly Benztropine 1 mg q.a.m. 2 mg lunch	206	7.5 mg TID	Citalopram 40 mg QAM Clobazam 10 mg TID Divalproex 1000 mg BID Propranolol 10 mg TID Clozapine 225 mg BID	Benztropine0.5 mg bid Citalopram 40 mg daily Clozapine 150 mg q.a.m & 200 mg q.h.s Divalproex 750 mg q.a.m and 1000 mg q.h.sZopiclone 7.5 mg at noon & 15 mg q.h.s	12	6	3	2	1		0.25	2.25	0	0	0	0		NR	No	26 y.o male leaving in a group home with a Dx of Intellectual disability and history of birth asphyxia an severe traumatic head injury at age 6. Presented to hospatiental after an escalation of violent behavior toward his support care workers. In hospital he continued to show aggressive behavior. Patient was started on Zopiclone with great improvement, showing no episodes of aggression, and was e…	Marked improvement of aggressive behavior
36	M	69	Bipolar Type I, most recent episode manic Possible Vascular Neurocognitive Disorder	Long term history of severe Bipolar I	Agitation, affective lability	Yes	Symmetrical, irregular, moderate amplitude, reactive 8 Hz occipital activity. Lower amp 13-29 Hz frq seen frontally and centrally, and temporally moderate amp 8-12 Hz waves predominate. Higher amp 1-3 Hz waves disturbs the background, more towards the frontal regions. Impression: Dysrhythmia grade II, generalized.	Yes	91	Quetiapine XR 600 mg p.o. at bedtime. Lithium carbonate 300 mg p.o. q.a.m. and 600 mg p.o. at bedtime.	8	7.5 mg TID + 15 mg bedtime	Divalproex 500 mg p.o. BID Galantamine p.o. 8 mg QAM Lithium carbonate p.o. 600 mg at bedtime Risperidone p.o. 0.5 mg BID	Lithium 600 mg h.s Clozapine 50 mg p.o. q.12 h. and 100 mg p.o. nightly. Divalproex sodium 750 mg p.o. q.a.m. and nightly. Zopiclone 7.5 mg p.o. nightly.	1	6	6	4	14		0	0	0	0	0	0		Slurred speech. Patient didn't like it and refused to continue	Yes	69 y.o male living alone, who had suffered from a severe bipolar I disorder with a history of multiple hospitalizations. Patient tried on multiple medications with no results. ECT was considered, but Patient hesitant to try again, as he has severe cognitive sequelae from a previous one. Zopiclone was tried but deemed an inadequate trail, no early improvement, slurred speech, and Patient didn't li…	No improvement. Patient refused to continue zopiclone due to side effects
37	F	63	Bipolar Mood Disorder, mixed state Cluster B traits Possible of vascular neurocognitive disorder	Not known	Abnormal EEG, Agitation	Yes	Symmetrical, irregular, moderate amplitude, reactive 7 Hz occipital activity. Lower amp 13-29 Hz frq seen frontally and centrally, and temporally moderate amp 4-8 Hz waves predominate. The 4-8 Hz activity is fairly generalized and can be seen frontally and occipitally as well. Impression: Abnormal tracing and demonstrates a generalized slowing in all head regions.	Yes	95	Venlafaxine 300 mg p.o. daily. Lithium 300 mg p.o. twice daily. Cymbalta 60 mg daily. Trazodone 200 mg p.o. nightly	29	7.5 mg QID	Donepezil 5 mg p.o. nightly. Duloxetine 60 mg p.o. daily. Lithium carbonate 150 mg at bedtime. Lurasidone 80 mg supper.	Donepezil 5 mg p.o. nightly. Duloxetine 60 mg p.o. daily. Lithium carbonate 150 mg at bedtime. Lurasidone 80 mg supper. Zopiclone 7.5 mg 4 times a day.	3	4	3	2	5		0	0	0	0	0	0		NR	No	63 y.o female brought to hospital due to suicide intent (overdose). While in hospital, patient complained of memory problems and a neurocognitive assessment revealed impairment in several domains of cognitive functioning, including complex attentional deficits, verbal and spacial memory, perceptual motor skills, and some aspects of executive functioning. Neuroimaging provided evidence of small ve…	Marked improvement of agitation. Improved concentration Baseline MOCA=17/30; During zopiclone MOCA=21/30
39	F	39	NCD Due to Traumatic Brain Injury. Major Depressive Disorder Substance Use Disorder Seizure Disorder	Age 21, neurosurgery for removal of frontal arteriovenous malformation. After surgery: recurrent generalized tonic-clonic seizures. Comorbid alcohol and cannabis use disorder.	Abnormal EEG, Aggression	Yes	Abnormal EEG with a sustained pattern of excess slow delta activity arising within the right frontal-polar-anterior temporal region. This would imply a structural lesion within this field of distribution, likely correlated with the descripatiention of an arthero-venous malformation. There is in addition a sustained pattern of breach rhythm of high voltage, fast beta frequencies in the same field …	Yes	47	Levetiracetam 750 mg q.a.m & at 6:00 pm Risperidone 3 mg q.a.m &q.h.s. Duloxetine 90 mg q.a.m Benztropine 1 mg q.a.m & at 6:00 pm Zopiclone 7.5 mg at bedtime prn Quetiapine 50 to 100 mg QID prn	44	11.25 QID	Levetiracetam 750 mg BID Risperidone 1 mg p.o. BID	Duloxetine 90 mg p.o. QAM Quetiapine 25 mg p.o. TID Risperidone 1 mg p.o. BID Zopiclone 11.25 p.o. QID	6	4	3	2	5		0	0	0	0	0	0		NR	No	39 y.o. female. Recent presentation leading to admission: episodic confusion, disorientation, depression, suicidality, sudden aggression (charged for assaulting 2 peace officers). New treatment: risperidone reduced to 1 mg BID, ZPC 11.25 mg QID. Patient was discharged very much improved: clear sensorium, no residual depression/suicidality, no new anger outbursts.	Improved alertness and orientation. Resolution of aggressive behavior
41	M	60s	Dementia due to Hypoxic Encephalopathy secondary to cardiac arrest	Age 56	Abnormal EEG, Ataxic cerebral palsy	Yes	Baseline EEG showed intermittent brief runs of high amplitude 1-3 Hz waves predominantly over the right sides leads and frontally, as well as frequent 4-8 Hz waves over the central and temporal regions.​ After ZPC: EEG normal with no evidence of intrusion of slow frequency waves.​	Yes	251	Quetiapine 200 mg BID Valproic Acid 500 mg BID	69	15 mg QAM + 7.5 mg Qafternoon	Mirtazapine 15 mg at bedtime	Zopiclone 15 mg QAM + 7.5 mg at 5:00pm Mirtazapine 15 mg at bedtime	10	6	3	1	1		1	4	0	0	0.1	0.7		NR	No	60 y.o male admitted to our PICU due to agitation and aggression. History of cardiac arrest and severe hypoxic brain injury (age of 47). One of his regular behaviors was to insist that he still had a wife and a home to return to or that he had to drive his truck to work. Violent with staff attempatienting to refrain him from leaving the unit. Mute, excepatient for occasional short incomplete sent…	Remarkable improvement of vigilance, motor functions, including hands fine movements, precision and strength, speech, mood. No new episodes of violence.
43	F	38	Schizoaffective Disorder Mild neurocognitive disorder	Age 30	Aggression, abnormal EEG	Yes	Symmetrical, irregular, moderate amplitude, reactive 8 Hz occipital activity. Lower amp 13-29 Hz frq seen in the frontal regions and these faster frq are superimposed upon posterior head regions. Centrally & temporally moderate amp 8-12 Hz waves predominate. At times some 4-8 Hz waves are intermingled within the background, generally as isolated waves. Overall the tracing is essentially normal.	No	843	Lithium Carb 1200 mg h.s. Quetiapine XR 600 mg h.s.	13	15 mg QID	Quetiapine XR 800 mg at bedtime Lithium carbonate 1200 mg at bedtime Divalproex 500 mg BID	Donepezil 10 mg q.a.m Lamotrigine 50 mg p.o. q.a.m & q.p.m. Venlafaxine XR 150 mg p.o q.a.m	3	6	5	3	9		1	3.625	0	0	1	2.33333		NR	No	38 y.o female with a significant psychiatric history, with 9 admissions regarding major depressive episodes with psychotic and/or catatonic features. Patient had a long admission due to the resistant nature of her illness. She was tried on multiple medication with no effects. While in the hospital patient. had a neuropsychiatric assessment and was started on Donepezil with great results. Zopiclon…	Minimal improvement while receiving zopiclone daytime
44	M	55	Difficult-to-treat Schizoaffective disorder, bipolar type Major neurocognitive disorder, mixed etiology	Age 13	Aggressive behavior Sexual disinhibition Tremor	Yes	Symmetrical, irregular, moderate amplitude, reactive 10 Hz occipital activity. Lower amp 13-29 Hz frq seen in the frontal regions and these faster frq are superimposed upon posterior head regions. Centrally & temporally moderate amp 8-12 Hz waves predominate.	No	879	Aripiprazole 15 mg bid Clonazepam 0.5 mg bid Lamotrigine 25 mg q.a.m Quetiapine 100 mg q.h.s. Quetiapine XR 50 mg at bedtime Zopiclone 7.5 mg at bedtime	265	15 mg QID	Aripiprazole 15 mg tid Clonazepam 0.5 mg bid Lamotrigine 25 mg q.a.m Quetiapine 25 mg BID Quetiapine XR 300 mg at supper	Clonazepam 1 mg p.o. b.i.d. Clozapine 200 mg p.o. nightly. Seroquel XR 200 mg p.o. q. supper. Seroquel XR 100 mg p.o. q.a.m. Benztropine 1 mg BID Lamotrigine 150 mg BID Sinemet 25 mg TID	12	5	4	2	5		1.33333	5.33333	0	0	0.555556	1.27778		NR	No	55 y.o male with a longstanding psychiatric history. Patient had multiple hospital admissions over the years starting in his adolescence. Patient was tried on multiple medication including Clozapine and ECT. Zopiclone day-time was started due to aggressive behavior and sexual disinhibition. After a few weeks of treatment, patient's manual dexterity improved significantly, and he started attending…	Marked improvement of aggressive behavior, impulsiveness, sexual disinhibition, and manual dexterity.
45	M	56	Schizoaffective Disorder Antisocial traits	Early 20s	Severe assaultive behavior	No			203	Valproic Acid 1000 mg b.i.d, Quetiapine XR 300 mg q.a.m Quetiapine XR 500 mg at bedtime Zuclopenthixoll IM 200 mg every w @ 8:00	12	3.75 QID	Quetiapine XR 300 mg BID Zuclopenthixol Decanoat IM 200 mg IM weekly Valproic acid 1000 mg BID	Haloperidol 10 mg po at bedtime Lorazepam 2 mg at bedtime Zuclopenthixol Decanoat IM 200 mg IM weekly	2	5	5	4	13		0	0	0	0	0	0		Drowsiness	Yes	56 y.o male with a long history of severe difficult to treat schizo-affective disorder, bipolar type. Previous long hospitalization in a forensic unit as NCR after committing murder in a psychotic state. In recent years recurrent exacerbations with severe assaultive behavior in response to command auditory hallucinations of delusional beliefs. Zopiclone was tried but Patient took it sporadically,…	No reported improvement. Dosage could not be titrated due to subjective complaints of sedation
46	F	48	Borderline personality disorder Schizoaffective disorder Pathological gambling Alcohol abuse ADHD	Not known, presumably since early adulthood.	Aggressive behavior	No			70	Invega Sustenna 150 mg every 4 weeks Vyvanse 50 mg p.o. daily Venlafaxine XR 300 mg p.o. at bedtime Lorazepam 1 mg p.o. bid	30	3.75 mg TID	Invega Sustenna 150 mg every 4 weeksx Lisdexamphetamine 60 mg QAM Lorazepam 1 mg BID Venlafaxine XR 225 mg QAM	Invega Sustenna 150 mg every 4 weeks	6	5	5	4	13		0.5	1.25	0	0	0.333333	0.666667		NR	No	48 y.o female with longstanding psychiatric history with 29 admissions just in our hospital. This new admission was caused by a new exacerbation of paranoid ideation and outbursts of anger. While in hospital her progress was hindered by poor compliance to prescribed medications and one elopment from hospital.	No improvement. Zopiclone was stopped after she eloped from hospital.
47	F	41	Cannabis induced psychosis History of bipolar I disorder	age 41, but saw a psychologist at age 13	Verbally threatening and abusuve	Yes	Symmetrical, irregular, moderate amplitude, reactive 10 Hz occipital activity. Lower amp 13-29 Hz frq seen in the frontal regions, and centrally and temporally moderate amplitude 8-12 Hz waves predominate.	No	13	Dexedrine 20 mg bid Bupropion XR 150 mg once per day Risperidone 2 mg q.h.s	5	3.75 mg QID	Aripiprazole 5 mg q.a.m	Aripiprazole 5 mg q.a.m Zopiclone 3.75 qid	1	4	3	2	5		1	3	0	0	0	0		NR	No	41 y.o female brought to the hospital by police after exhibiting bizarre delusional ideas and behavior, probably induced by cannabbis use. Once admitted she settled quite rapidly. Treatment with zopiclone lasted only 5 days.	Marked improvement, possibly related to stopping cannabis use during hospitalization.
49	M	22	Schizophrenia Methamphetamine use disorder Antisocial personality disorder	Not known	Aggressive behavior	Yes	Symmetrical, irregular, moderate amplitude, reactive 9 Hz occipital activity. Lower amp 13-29 Hz frq seen frontally and these faster frequencies are superimposed upon more posterior head regions as well. Centrally & temporally moderate amplitude 8-12 Hz waves predominate.	No	77	Aripiprazole IM 400 mg every 4 weeks Divalproex 500 mg bid Olanzapine 10 mg bid Zopiclone 7.5 mg bedtime	69	15 mg QID	Aripiprazole 400 mg IM Q 4 weeks Olanzapine 20 mg daily Mirtazapine 45 mg bedtime	Aripiprazole 10 mg q.a.m. Divaproex 750 mg tid Mirtazapine 30 mg bedtime Zopiclone 15 mg qid	9	5	4	3	9		2	7	0	0	0.333333	1.66667		NR	No	22 y.o. male with a history of numerous admissions, violent temperament, criminal history. Different diagnoses over time: schizophrenia, substance-induced, antisocial p.d. Poor response and non-compliance with antipsychotic drugs. History of severe EPSE with several antipsychotic medications. Admitted to our PICU after a new psychotic episode. Lorazepam was discontinued and zopiclone slowly titra…	Marked initial improvement, which was not mantained due to non-complainace & substance abuse
52	M	26	Polysubstance use disorder Substance-induced psychosis Autistic Spectrum Disorder history of traumatic brain injury with subarachnoid hemorrhage	Age 12	Aggressive behavior, sexual disinhibition, excessive theta and low alpha waves on EEG.	Yes	Symmetrical, irregular, moderate amplitude, reactive 10 Hz occipital activity. Lower amp 13-29 Hz frq seen frontally and these faster frequencies are superimposed upon more posterior head regions as well. Centrally & temporally moderate amplitude 8-12 Hz waves predominate. Occasionally some 4-8 Hz waves are intermingled within the background centrally and temporally and may reflect elements of dr…	No	49	Aripiprazole 400 mg IM every 3w Quetiapine XR 600 mg at supper Divalproex 250 mg bid	28	7.5 mg QID	Aripiprazole 400 mg IM every 3w Quetiapine XR 400 mg at supper	Aripiprazole 400 mg IM every 3w Chlorpromazine 75 mg at bedtime Quetiapine XR 400 mg at supper Zopiclone 7.5 mg qid	4	5	3	2	1		1.66667	3.83333	0	0	0	0		NR	No	26 y.o male, homeless with longstanding psychiatric history. History of autistic spectrum disorder, polysubstance use disorder, head injury with subarachnoid hemorrhage. Patient was tried on Zopiclone for his aggressive behavior with great improvement. Patient behavior improved greatly, started participating in programs, didn't have any incidents of sexual inappropriateness. Good medication compl…	Marked improvement of aggressive behavior and no recurrence of sexual inappropriate behaviors.
55	M	22	Schizoaffective disorder bipolar type Polysubstance abuse Antisocial personality disorder Historical Dx of ODD, ADHD, Tourette disorder	Adolescence	Aggression & Agitation	No			147	Divalproex 1000 mg p.o. nightly Olanzapine 5 mg p.o. q.a.m. Paliperidone Sustenna 150 mg IM q. 4 weeks Lorazepam 1 mg bid Risperidone 2 mg tid	32	15 mg QID	Mirtazapine 30 mg bedtime	Clozapine 225 mg p.o. q.h.s. Divalproex 1250 mg q.h.s. 250 mg q.a.m	8	5	4	3	9		0.5	1.5	0	0	1.9375	0.375		NR	No	22 y.o male with no fixed address on AISH with a Diagnosis of schizoaffective disorder bipolar type, polysubstance abuse, antisocial PD, and historical Dx of ODD, ADHD, and Tourette disorder. He had a history of multiple admissions and during the index admission his medication regimen was changed few times without so marked improvement. However he continued to misuse substances while in hospital …	No significant improvement. Assessment complicated by poor compliance and continued use of recreational substances while in hospital.
56	F	26	Borderline & Antisocial Personality Disorder Intellectual disability. Pseudo seizures and seizures disorder. Polysubstance use disorder Major Depressive Disorder Eating Disorders	From early chilhood. history of anoxic brain at birth due to umbilical cord strangulation, then multiple anoxic brain injuries in adulthood due to self-strangulation.	Aggressive Behavior and abnormal EEG	Yes	This is an abnormal EEG study. Alpha: poorly sustained. Delta: excess expression. There are short lasting bursts of high voltage delta activity with an anterior to posterior gradient. Theta: intermittent expression arising maximally within occipital regions, intermixed with the previously described alpha waveforms, 5 to 6 Hz, moderate vooltage.	Yes	799	Benztropine 1 mg bid Loxapine 10 mg bedtime Oxazepam 10 mg bid Suboxone 0.5 mg daily at 12:00	264	11.25 tid & 15 mg q.h.s	loxapine 20 mg at bedtime, paliperidone IM 100 mg Q 4 Weeks	Bromcripatientine 1.25 mg daily Suboxone 0.5 mg daily @12:00 Loxapine 10 mg q.h.s. Oxazepam 10 mg bid Risperidone 1 mg tid Zopiclone 11.25 tid & 15 mg q.h.s	8	6	4	2	5		0	0	0	0	0	0		NR	No	26 y.o. female with a history of perinatal hypoxia. IQ 64. Opioid use disorder. Seizure and pseudo-seizure disorder. Extensive forensic history due to violent behavior. Several near fatal suicide attempatients (hanging and overdose). Treatment resistance (multiple antipsychotics, antiepilepatientics, BDZs). New medication: Zopiclone slowly titrated to 11.25 mg TID + 15 mg at bedtime, loxapine 20 …	Much improvement of aggressive behavior and resolution of suicidal behavior. However quick relapses due to elopments, medication non compliance and substance misuse.
60	M	31	Major Depressive Disorder with Psychotic Features Comorbid severe general anxiety disorder with panic attacks Obsessive Compulsive Disorder	Age 17	Difficult to treat anxiety	Yes	Low amplitude of 13-29 Hz frequencies on frontal region and centrally and temporally moderate amplitude 12 Hz space predominates.	No	133	Divalproex 1000 mg q.h.s Lamotrigene 25 mg q.supper Olanzapine 25 mg q.h.s Quetiapine 50 mg q.h.s Venlafaxine 300 mg q.a.m Zopiclone 7.5 mg q.h.s	9	7.5 QID	Divalproex 1000 mg q.h.s Lamotrigene 25 mg q.supper Olanzapine 25 mg q.h.s Quetiapine 50 mg q.h.s Venlafaxine XR 300 mg q.a.m	Divalproex 1000 mg q.h.s Lamotrigene 25 mg q.supper Olanzapine 25 mg q.h.s Quetiapine 50 mg q.h.s Venlafaxine XR 300 mg q.a.m Zopiclone 7.5 mg q.h.s	2	4	4	4	13		0.25	2	0	0	0.5	1.75		NR	No	31 y.o male who leaves with his father. Patient was under care of Child Psychiatry since he was 17 y.o with a long history of anxiety. Patient reported that his anxiety improved between the age of 21 to 31 for no specific reason. Recently his anxiety and panic attacks had restarted after he had a tooth extraction leading to a panic attack. At the beginning of admission the Patient was very resist…	Overall no change after adding zopiclone daytime. Patient requested to stop it because of not causing either any benefits or any harm.
61	M	25	Schizoaffective disorder Organic Brain Syndrome secondary to solvent sniffing ADHD FASD Cannabis use disorder, cannabis induced psychosis Antisocial & Narcissistic personality traits	Age 11	Aggression, sexual inappropriateness	No			328	Paliperidone 150 mg every 3weeks Quetiapine 50 mg q.h.s.	70	2.5 mg BID	Benztropine 0.5 mg BID Paliperidone 150 mg IM Q 4 weeks Quetiapine 50 mg at bedtime	Clozapine 200 mg p.o. at bedtime.	8	4	5	3	9		0.5	2.375	1	4	0.125	4		NR	No	25 y.o male living in a group home with past Dx of ADHD, FASD, organic brain syndrome secondary to solvent sniffing, cannabis use disorder, schizoaffective disorder, and antisocial/narcissistic personality traits. Was brought to AHE on form 23 due to aggression, threatening behavior, and sexual inappropriateness. Patient had recurrent admissions secondary to non adherence to depo antipsychotics. …	No improvement. Patient continued to use recreational substances contrabanded on the unit.
64	M	33	Schizoaffective disorder, bipolar type, polysubstance use disorder, unspecified intellectual disability	Age 25	Aggressive Behavior	No			516	Zuclopenthixol decanoate IM 300 mg Q 2 weeks Quetiapine 300 mg daily	498	10 mg bid & 15 mg at bedtime	Methotrimeprazine 25 mg bedtime Quetiapine XR 800 mg supper	Methotrimeprazine 25 mg bedtime Quetiapine XR 800 mg supper Zopiclone 10 mg bid & 15 mg at bedtime	8	5	4	4	13		1	2.66667	0	0	0.625	1.25		NR	No	33 y.o. man, single, no children, homeless and supported by AISH. Patient has a long history of schizoaffective disorder, bipolar type, with numerous and prolonged admissions in general and forensic psychiatric units. With regard to his forensic history - He has 57 previous convictions for sexual assault, assault of a peace officer, assault with weapon, drug trafficking, cocaine possession, breac…	No improvement. However assessment made difficult by erratic behavior, poor compliance, repeated elopments and possible use of recreational drugs while in hospital.
